# Supplementary material for: The Expression of Antibiotic Resistance Methyltransferase Correlates with mRNA Stability Independently of Ribosome Stalling
Source: PubMed Central journal article supplement (PMC5118997; doi:10.1128/aac.01806-16), 2016-11-21
Supplement: AAC.01806-16_zac012165732so1.pdf [file AAC.01806-16_zac012165732so1.pdf]

## SUPPLEMENTAL FIGURES

|          | Species_GenBank accession                    | ErmBL variants                          |
|----------|----------------------------------------------|-----------------------------------------|
| Gram (+) | <i>E. faecalis</i> _U86375                   | MLVFQMCN...VDKTSTVLKQTKNSDYADK          |
|          | <i>E. faecalis</i> _M11180                   | MLVFQMRN...VDKTSTVLKQTKNSDYADK          |
|          | <i>L. fermentum</i> _AJ488494                | M.....RN...VDKTSTVLKQTKNSDYADK          |
|          | <i>S. intermedius</i> _AF299292              | MLVFQMRN...VDKTSTVLKQTKNSDLRR           |
|          | <i>L. reuteri</i> _AF080450                  | MLVFQIRN...VDKTSTGLKQTKNSDYADK          |
|          | <i>S. sanguinis</i> _K00551                  | MLVFQMRN...VDKTSTILKQTKNSDYVDKYVRLIPTSD |
|          | <i>C. difficile</i> _JN607214                | MLVFQMRN...VDKTSTVLKQTKNSDYTDK          |
| Gram (-) | <sup>1</sup> <i>S. aureus</i> _CM05_EF450709 | MLVFQMRY...VDKTSTVLKQTKNSDYADK          |
|          | <sup>2</sup> <i>E. faecium</i> _EOH42568     | MLVFQMRYQMRYVDKTSTVLKQTKNSDYADK         |
|          | <sup>2</sup> <i>E. coli</i> _NC014615        | MLVFQMRYQMRYVDKTSTVLKQTKKSDYADK         |
|          | <sup>2</sup> <i>K. pneumoniae</i> _KT725788  | MLVFQMRYQMRYVDKTSTVLKQTKKSDYADK         |
|          | <sup>2</sup> <i>S. flexneri</i> _AMN61099    | MLVFQMRYQMRYVDKTSTVLKQTKKSDYADK         |
|          | <sup>2</sup> <i>S. sonnei</i> _CZQ23930      | MLVFQMRYQMRYVDKTSTVLKQTKKSDYADK         |

stalling site

**Figure S1. Multiple sequence alignment shows that ErmBL homologs are highly conserved.**

The ribosome-stalling site D10 is labeled in red. <sup>1</sup> ErmBL<sub>EF</sub> variant used in this study, this variant contains an Y8 in place of an N8. <sup>2</sup>Tandem duplication of “QMRY” renders high basal and inducible ErmB expression.

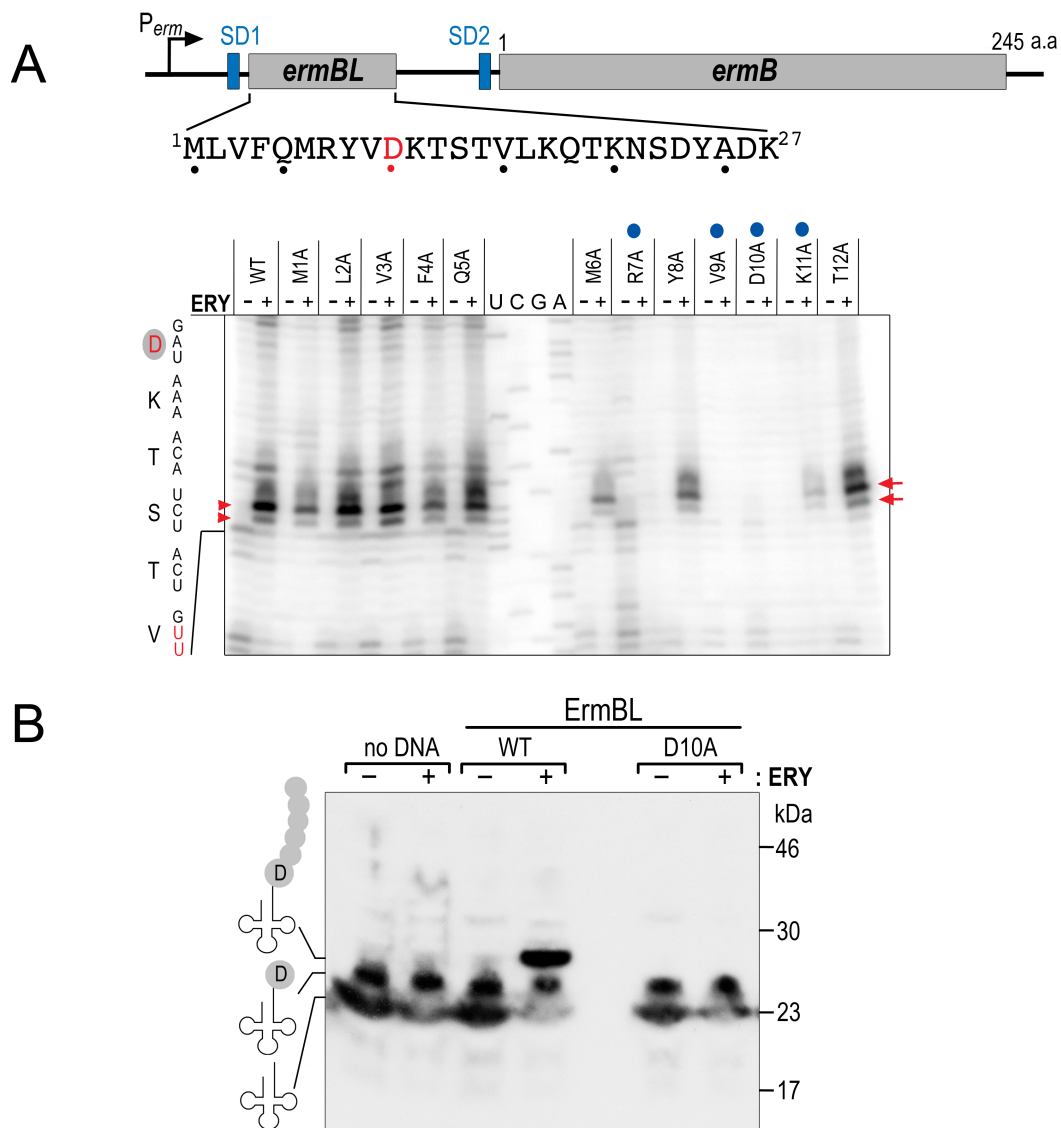

**Figure S2. Toeprinting and Northern blot identify the stalling motif and stalling site of ErmBL<sub>EF</sub> leader peptide. (A)** Alanine scanning mutants analyzed by toeprinting reveal the critical residues (R7, V9, D10 and K11, blue circles) necessary for full translation arrest. Red arrows mark the toeprint bands that confirm the P-site codon is an aspartate. **(B)** Northern blot shows that Asp10 is the last amino acid incorporated into the stalled nascent peptidyl-tRNA. The tRNA, aminoacyl-tRNA and peptidyl-tRNA are illustrated.

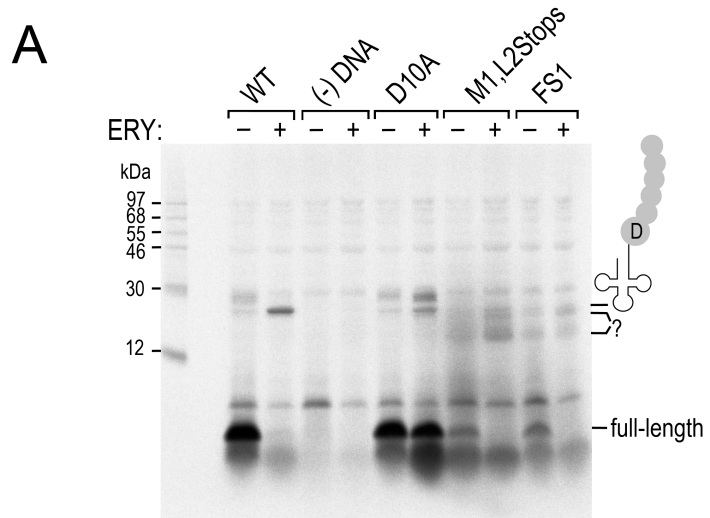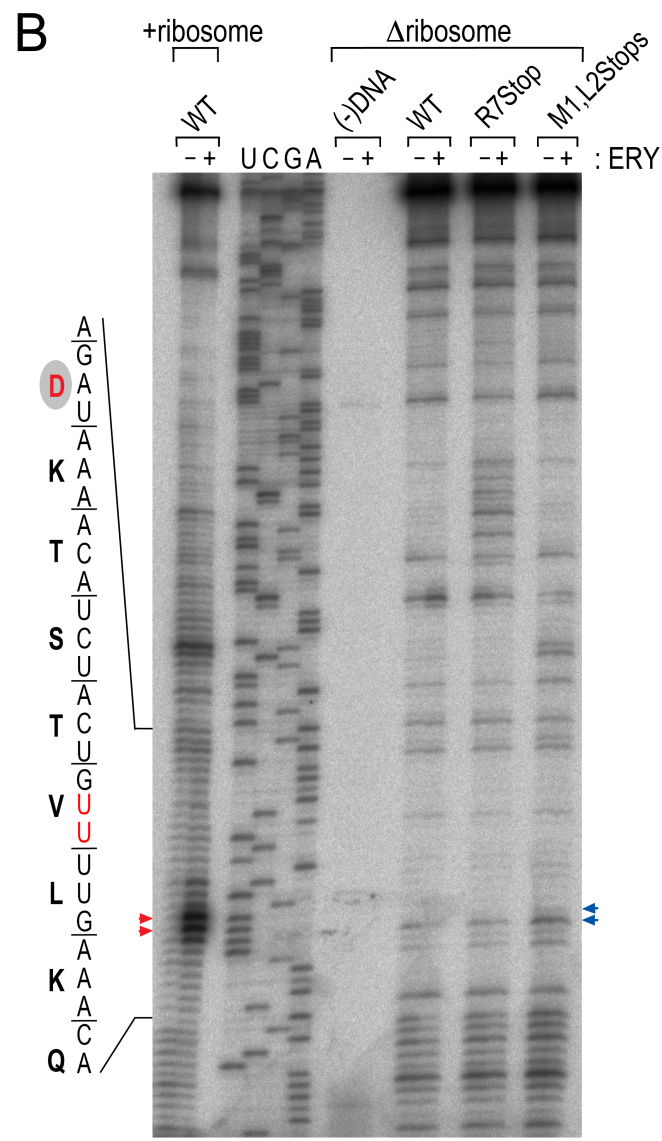

**Figure S3. Confirmation of the source of the background bands in the *ermBL<sub>EF</sub>* toeprinting reactions.** (A) *In vitro* translation of *ermBL<sub>EF</sub>* derivatives with <sup>35</sup>S-methionine labeling. Stalled peptidyl-tRNA<sup>Asp</sup> is stabilized in the presence of erythromycin (ERY), as indicated by a strong ~22 kDa band and the disappearance of the full-length *ErmBL<sub>EF</sub>*. D10A mutant is impaired in ribosome stalling but not completely defective, thus the co-existence of the ~22 kDa peptidyl-tRNA<sup>Asp</sup> and the full-length *ErmBL<sub>EF</sub>*. Residual translational read-through is observed in the M1L2stop double mutant and the frameshift mutant FS1 in the absence of ERY. In the presence of ERY, additional unknown products of higher molecular weight (depicted in a question mark) are generated. (B) The omission of ribosome from the *in vitro* toeprinting reaction produces background bands (blue arrows). Red arrows mark the true *ErmBL(D10)* toeprints. Each untranslated *ermBL<sub>EF</sub>* mutant mRNA appears to adopt distinct conformation relative to the WT, as shown from the patterns of the primer extension, however the structural variations are unaffected by ERY treatment.

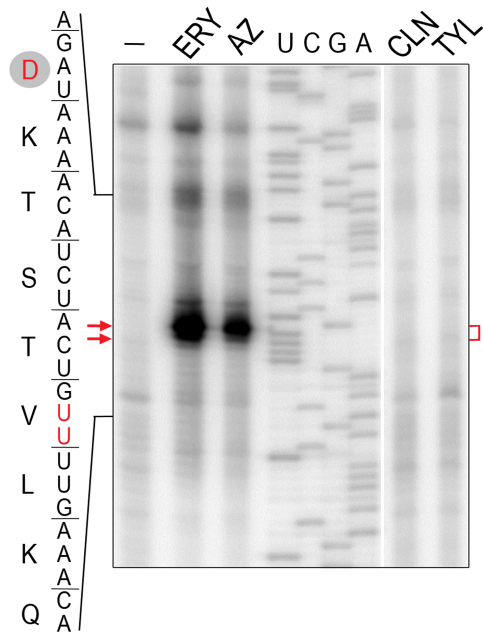

**Figure S4. Erythromycin (ERY) and azithromycin (AZ) induce ErmBL<sub>EF</sub>-dependent ribosome stalling *in vitro*, but clindamycin (CLN) and tylosin (TYL) do not.** ERY, AZ and TYL belong to the 14-membered 15-membered, and 16-membered macrolide, respectively. CLN is a lincosamide. ERY and AZ were used at a final concentration of 50  $\mu$ M and 25  $\mu$ M, respectively. A range of CLN and TYL dosages (0-500  $\mu$ M) was tested but only the data from 50  $\mu$ M is shown. Red arrows mark the D10 toeprint signals.

**A**

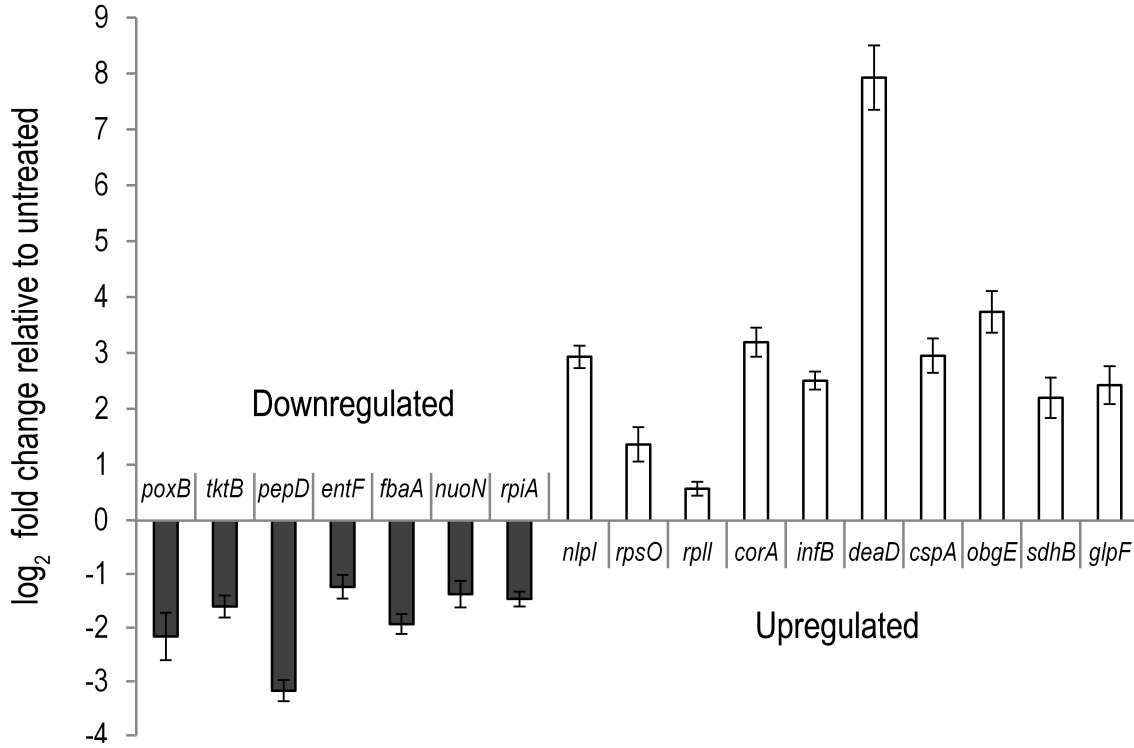

**B**

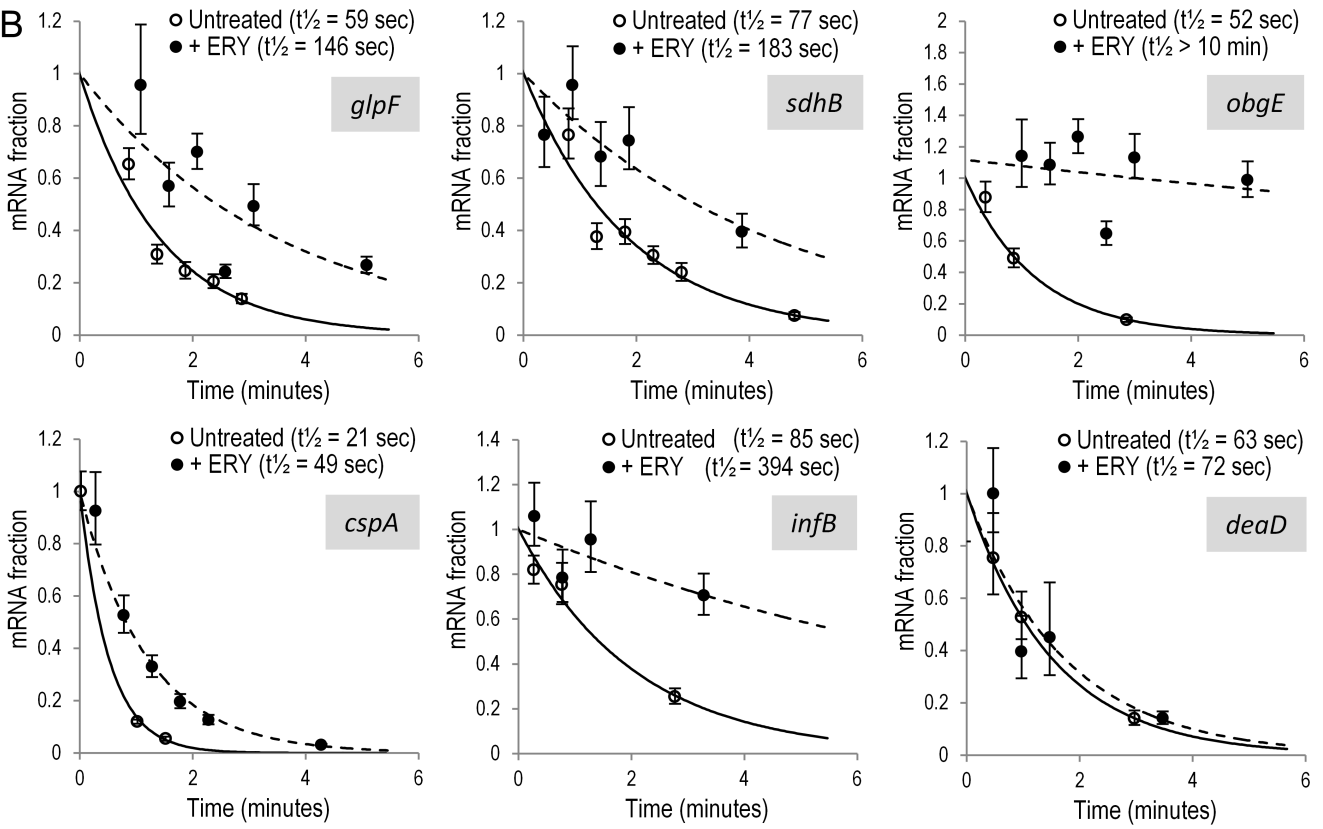

**Figure S5. Quantitative RT-PCR validates the RNA-seq results and reveals that the half-lives of a large fraction of antibiotic-upregulated genes are extended upon antibiotic treatment. (A)** The trend and fold change of the ERY-affected genes are consistent with the RNA-seq data (see Dataset 1). **(B)** Rifampicin chase/qRT-PCR shows that except for *deaD*, all of the other 5 antibiotic-upregulated genes have increased mRNA half-lives by at least 2-fold. Error bars are standard deviation of mean from two independent biological replicates.

**Table S1. Bacterial strains and plasmids used in this study.**

| Strains/plasmids            | Relevant characteristics                                                                                                                                                               | Source                   |
|-----------------------------|----------------------------------------------------------------------------------------------------------------------------------------------------------------------------------------|--------------------------|
| <b>S. aureus</b>            |                                                                                                                                                                                        |                          |
| CM05                        | Resistant to erythromycin, clindamycin, chloramphenicol, ciprofloxacin, dalfopristin, gentamicin, oxacillin, linezolid, and quinupristin.                                              | BEI resources            |
| <b>E. coli</b>              |                                                                                                                                                                                        |                          |
| DH5 $\alpha$                | <i>supE44 ΔlacU169 (Δ80lacZΔM15) hsdR17 recA1EndA1 gyrA96 thi-1 relA1</i>                                                                                                              | Clontech                 |
| XL1-Blue                    | <i>endA1 gyrA96(nal<sup>k</sup>) thi-1 recA1 relA1 lac glnV44 F'[::Tn10 proAB<sup>+</sup> lacI<sup>q</sup> Δ(lacZ)M15] hsdR17(r<sub>K</sub><sup>-</sup> m<sub>K</sub><sup>+</sup>)</i> | Stratagene               |
| MG1655                      | Wild-type K12                                                                                                                                                                          |                          |
| NM580                       | MG1655 <i>lacI-T1T2-zeo<sup>R</sup>-pBRpLacO-kan-pBAD-ccdB. Mini-λ-Red::tet<sup>R</sup></i>                                                                                            | Nadim Majdalani Ref. (1) |
| MNY55                       | NM580 <i>ermBL(WT)-ermB'-lacZ</i>                                                                                                                                                      | This study               |
| KL29                        | NM580 <i>ermBL(FS1)-ermB'-lacZ</i>                                                                                                                                                     | This study               |
| MNY57                       | NM580 <i>ermBL(FS2)-ermB'-lacZ</i>                                                                                                                                                     | This study               |
| MNY59                       | NM580 <i>ermBL(D10A)-ermB'-lacZ</i>                                                                                                                                                    | This study               |
| MNY61                       | NM580 <i>ermBL(M1A)-ermB'-lacZ</i>                                                                                                                                                     | This study               |
| KL01                        | NM580 <i>ermBL(M6A)-ermB'-lacZ</i>                                                                                                                                                     | This study               |
| SA03                        | NM580 <i>ermBL(R7A)-ermB'-lacZ</i>                                                                                                                                                     | This study               |
| SA05                        | NM580 <i>ermBL(Y8A)-ermB'-lacZ</i>                                                                                                                                                     | This study               |
| SA07                        | NM580 <i>ermBL(V9A)-ermB'-lacZ</i>                                                                                                                                                     | This study               |
| KL03                        | NM580 <i>ermBL(T12A)-ermB'-lacZ</i>                                                                                                                                                    | This study               |
| KL17                        | NM580 <i>ermBL(M1Stop)-ermB'-lacZ</i>                                                                                                                                                  | This study               |
| KL18                        | NM580 <i>ermBL(L2Stop)-ermB'-lacZ</i>                                                                                                                                                  | This study               |
| MNY64                       | NM580 <i>ermBL(M1,L2Stops)-ermB'-lacZ</i>                                                                                                                                              | This study               |
| KL19                        | NM580 <i>ermBL(V3Stop)-ermB'-lacZ</i>                                                                                                                                                  | This study               |
| KL20                        | NM580 <i>ermBL(F4Stop)-ermB'-lacZ</i>                                                                                                                                                  | This study               |
| KL21                        | NM580 <i>ermBL(Q5Stop)-ermB'-lacZ</i>                                                                                                                                                  | This study               |
| KL22                        | NM580 <i>ermBL(M6Stop)-ermB'-lacZ</i>                                                                                                                                                  | This study               |
| SA11                        | NM580 <i>ermBL(R7Stop)-ermB'-lacZ</i>                                                                                                                                                  | This study               |
| KL23                        | NM580 <i>ermBL(M1Stop)-lacZ</i>                                                                                                                                                        | This study               |
| KL24                        | NM580 <i>ermBL(L2Stop)-lacZ</i>                                                                                                                                                        | This study               |
| KL25                        | NM580 <i>ermBL(V3Stop)-lacZ</i>                                                                                                                                                        | This study               |
| KL26                        | NM580 <i>ermBL(F4Stop)-lacZ</i>                                                                                                                                                        | This study               |
| KL27                        | NM580 <i>ermBL(Q5Stop)-lacZ</i>                                                                                                                                                        | This study               |
| KL28                        | NM580 <i>ermBL(M6Stop)-lacZ</i>                                                                                                                                                        | This study               |
| <b>Plasmids</b>             |                                                                                                                                                                                        |                          |
| pGEMT-Easy(pTA) derivatives | Ap <sup>R</sup> ; cloning vector                                                                                                                                                       | Promega                  |
|                             | pTAermBL(WT)-ermB, Ap <sup>R</sup>                                                                                                                                                     | This study               |
|                             | pTAermBL(L2Stop)-ermB, Ap <sup>R</sup>                                                                                                                                                 | This study               |
|                             | pTAermBL(Q5Stop)-ermB, Ap <sup>R</sup>                                                                                                                                                 | This study               |
|                             | pTAermBL(R7Stop)-ermB, Ap <sup>R</sup>                                                                                                                                                 | This study               |
|                             | pTAermBL(D10A)-ermB, Ap <sup>R</sup>                                                                                                                                                   | This study               |
|                             | pTAermBL-ermB (Y103A), Ap <sup>R</sup>                                                                                                                                                 | This study               |
| pRB381                      | Ap <sup>R</sup> , <i>lacZ</i> translational fusion plasmid                                                                                                                             | ATCC 77377               |
| p381ermBL-B'                | Ap <sup>R</sup> , translational fusion P <sub>erm</sub> -ermBL-ermB' on pRB381.                                                                                                        | This study               |



**Table S2. Primers used in this study**

| Primer                                                                                                                                                         | Sequence (5'-3')                                                                                                                                                                                                                                                                                                                                                                                                                                                                                                                                                                                                                                                                                                                                                                                                                                                                                                                                                                                                                                                                                                                                                                                                                                                                                                                                          | Application                                                                          |
|----------------------------------------------------------------------------------------------------------------------------------------------------------------|-----------------------------------------------------------------------------------------------------------------------------------------------------------------------------------------------------------------------------------------------------------------------------------------------------------------------------------------------------------------------------------------------------------------------------------------------------------------------------------------------------------------------------------------------------------------------------------------------------------------------------------------------------------------------------------------------------------------------------------------------------------------------------------------------------------------------------------------------------------------------------------------------------------------------------------------------------------------------------------------------------------------------------------------------------------------------------------------------------------------------------------------------------------------------------------------------------------------------------------------------------------------------------------------------------------------------------------------------------------|--------------------------------------------------------------------------------------|
| p494f<br>p495r                                                                                                                                                 | GCG CGG TGA GCA CCG GAA CGG CAC TGG TCA ACT TGG CCA TAA GCT TAG AAG CAA ACT TAA<br>GGG TAA CGC CAG GGT TTT CCC AGT CAC GAC GTT GTA AAA CGA CGG GAT CCG TTA AAA AGT                                                                                                                                                                                                                                                                                                                                                                                                                                                                                                                                                                                                                                                                                                                                                                                                                                                                                                                                                                                                                                                                                                                                                                                        | homologous recombination to the <i>lacZ</i> locus of <i>E. coli</i> NM580 chromosome |
| p500f<br>p497r                                                                                                                                                 | TGATGAACAGGGTCACGTCGTCGCCGA<br>CGG TGC GGG CCT CTT CGC TA                                                                                                                                                                                                                                                                                                                                                                                                                                                                                                                                                                                                                                                                                                                                                                                                                                                                                                                                                                                                                                                                                                                                                                                                                                                                                                 | colony PCR / sequencing primer with <i>E. coli</i> NM580 template                    |
| p719<br>p720<br>p721                                                                                                                                           | AAG CCT GCG ACC AAT TGA TTA AAA GTC AAC TGC TC<br>CGA ACC CGC GAC CCC CTG CGT GAC AGG CAG GTA TTC<br>CCA AAC CAG TTG CGC TAC CAA GCT GCG                                                                                                                                                                                                                                                                                                                                                                                                                                                                                                                                                                                                                                                                                                                                                                                                                                                                                                                                                                                                                                                                                                                                                                                                                  | Lys-, Asp-, Pro-tRNA probes for Northern blots                                       |
| p700r<br>p299r                                                                                                                                                 | GTC ACT GGT AGG AAT TAA TCT AAC G<br>GTT TGT AAT TTT AGT TAT CTG TTT A                                                                                                                                                                                                                                                                                                                                                                                                                                                                                                                                                                                                                                                                                                                                                                                                                                                                                                                                                                                                                                                                                                                                                                                                                                                                                    | Reverse primers for <i>ermBL</i> toeprinting                                         |
| p195f<br>p262r                                                                                                                                                 | GAA ATT AAT ACG ACT CAC TAT AGG GAG ACC ACA ACG GTT TCC CTC TAG AAA TAA TTT TGT TTA<br>ACT TTA AGA AGG AGA TAT ACC A<br>AGA ATA TTT TAT ATT TTT GTT CAT                                                                                                                                                                                                                                                                                                                                                                                                                                                                                                                                                                                                                                                                                                                                                                                                                                                                                                                                                                                                                                                                                                                                                                                                   | Incorporating a T7 promoter to a toeprinting DNA template                            |
| p198f<br>p262r                                                                                                                                                 | TAA CTT TAA GAA GGA GAT ATA CCA ATG TTG GTA TTC CAA ATG CGT<br>AGA ATA TTT TAT ATT TTT GTT CAT                                                                                                                                                                                                                                                                                                                                                                                                                                                                                                                                                                                                                                                                                                                                                                                                                                                                                                                                                                                                                                                                                                                                                                                                                                                            | PCR a toeprinting template from plasmid or chromosome                                |
| p607f<br>p608f<br>p609f<br>p610f<br>p611f<br>p612f<br>p616f<br>p617f<br>p618f<br>p619f<br>p620f<br>p633f<br>p632f<br>p816f<br>p817f<br>p818f<br>p819f<br>p820f | TAA CTT TAA GAA GGA GAT ATA CCA GCG TTG GTA TTC CAA ATG CGT (M1A)<br>TAG TAA CTT TAA GAA GGA GAT ATA CCA TAG TTG GTA TTC CAA ATG CGT (M1Stop/TAG)<br>TAA CTT TAA GAA GGA GAT ATA CCA TAG TAA GTA TTC CAA ATG CGT (M1Stop,L2Stop)<br>TAA CTT TAA GAA GGA GAT ATA CCA ATG A TTG GTA TTC CAA ATG CGT (FS1)<br>TAA CTT TAA GAA GGA GAT ATA CCA ATG AA TTG GTA TTC CAA ATG CGT (FS2)<br>TAA CTT TAA GAA GGA GAT ATA CCA ATG TTG GTA TTC CAA GCG CGT (M6A)<br>TAA CTT TAA GAA GGA GAT ATA CCA ATG GCG GTA TTC CAA ATG CGT (L2A)<br>TAA CTT TAA GAA GGA GAT ATA CCA ATG TTG GCG TTC CAA ATG CGT (V3A)<br>TAA CTT TAA GAA GGA GAT ATA CCA ATG TTG GTA GCG CAA ATG CGT (F4A)<br>TAA CTT TAA GAA GGA GAT ATA CCA ATG TTG GTA TTC GCG ATG CGT (Q5A)<br>TAA CTT TAA GAA GGA GAT ATA CCA ATG TTG GTA TTC CAA ATG GCG (R7A)<br>TAA CTT TAA GAA GGA GAT ATA CCA ATG TAA GTA TTC CAA ATG CGT (L2Stop)<br>TAA CTT TAA GAA GGA GAT ATA CCA ATG TTG GTA TTC CAA ATG TAA TAT G (R7Stop)<br>TAA TAA CTT TAA GAA GGA GAT ATA CCA TAA TTG GTA TTC CAA ATG CGT (M1Stop/TAA)<br>TAA CTT TAA GAA GGA GAT ATA CCA ATG TTG TAA TTC CAA ATG CGT (V3Stop)<br>TAA CTT TAA GAA GGA GAT ATA CCA ATG TTG GTA TAA CAA ATG CGT (F4Stop)<br>TAA CTT TAA GAA GGA GAT ATA CCA ATG TTG GTA TTC TAA ATG CGT (Q5Stop)<br>TAA CTT TAA GAA GGA GAT ATA CCA ATG TTG GTA TTC CAA TAA CGT TAT G (M6Stop) | Alternate mutation-containing forward primers to create a toeprinting template       |
| p827f<br>p828r                                                                                                                                                 | TGG GAA TAT TCC TGC CCA TTT AAG CAC A<br>TGT GCT TAA ATG GGC AGG AAT ATT CCC A                                                                                                                                                                                                                                                                                                                                                                                                                                                                                                                                                                                                                                                                                                                                                                                                                                                                                                                                                                                                                                                                                                                                                                                                                                                                            | <i>ermB</i> (Y103A)                                                                  |
| p289<br>p290                                                                                                                                                   | GCG TTA ACT CGG CGT TTC ATC<br>TCT CCG GCG CGT AAA AAT G                                                                                                                                                                                                                                                                                                                                                                                                                                                                                                                                                                                                                                                                                                                                                                                                                                                                                                                                                                                                                                                                                                                                                                                                                                                                                                  | qPCR primers ( <i>lacZ</i> )                                                         |
| p907f<br>p763r                                                                                                                                                 | GTC GAA CGG TAA CAG GAA GAA G<br>AAA GTT TTG AGA ATA TTT TAT AT                                                                                                                                                                                                                                                                                                                                                                                                                                                                                                                                                                                                                                                                                                                                                                                                                                                                                                                                                                                                                                                                                                                                                                                                                                                                                           | qPCR primers (5'- <i>ermB</i> )                                                      |
| p19f<br>p20r                                                                                                                                                   | TCG TCT GGA AAA AGC TGC AAC T<br>TAC GTC ATC TTC GGT GTA GCC C                                                                                                                                                                                                                                                                                                                                                                                                                                                                                                                                                                                                                                                                                                                                                                                                                                                                                                                                                                                                                                                                                                                                                                                                                                                                                            | qPCR primer ( <i>gapA</i> )                                                          |
| p907f<br>p908r                                                                                                                                                 | GTC GAA CGG TAA CAG GAA GAA G<br>TGC GAC GTT ATG CGG TAT TAG                                                                                                                                                                                                                                                                                                                                                                                                                                                                                                                                                                                                                                                                                                                                                                                                                                                                                                                                                                                                                                                                                                                                                                                                                                                                                              | qPCR primers (16S rRNA)                                                              |
| p1010f<br>p1011r                                                                                                                                               | CTC AGT ATG GAT GCG GTA CAA A<br>GGG TCG GTA GGG TTA TGT TTA AG                                                                                                                                                                                                                                                                                                                                                                                                                                                                                                                                                                                                                                                                                                                                                                                                                                                                                                                                                                                                                                                                                                                                                                                                                                                                                           | qPCR primers ( <i>tktB</i> )                                                         |
| p1008f<br>p1009r                                                                                                                                               | AGC ACA ACT TAG CGG AGA AC<br>AGG GAA TAT GAG CGG CAA TC                                                                                                                                                                                                                                                                                                                                                                                                                                                                                                                                                                                                                                                                                                                                                                                                                                                                                                                                                                                                                                                                                                                                                                                                                                                                                                  | qPCR primers ( <i>poxB</i> )                                                         |
| p1012f<br>p1013r                                                                                                                                               | GAT TAA CAC CGA CTC CGA AGA A<br>GGA ACC GCT TCA CGA TCT AA                                                                                                                                                                                                                                                                                                                                                                                                                                                                                                                                                                                                                                                                                                                                                                                                                                                                                                                                                                                                                                                                                                                                                                                                                                                                                               | qPCR primers ( <i>pepD</i> )                                                         |
| p1014f<br>p1015r                                                                                                                                               | CTG ATA CAG GTG GCG GAT AAC<br>GGT AAT GGC CGG GAA ACT AA                                                                                                                                                                                                                                                                                                                                                                                                                                                                                                                                                                                                                                                                                                                                                                                                                                                                                                                                                                                                                                                                                                                                                                                                                                                                                                 | qPCR primers ( <i>entF</i> )                                                         |
| p1016f<br>p1017r                                                                                                                                               | ACG GTG GTG CTT CCT TTA TC<br>ACA CCA TAA TGT TCA GCC ATC T                                                                                                                                                                                                                                                                                                                                                                                                                                                                                                                                                                                                                                                                                                                                                                                                                                                                                                                                                                                                                                                                                                                                                                                                                                                                                               | qPCR primers ( <i>fbaA</i> )                                                         |
| p988f<br>p989r                                                                                                                                                 | GGT TTC GCT CTG GTT TGT TG<br>AAT ACC AGC CCG GTG TAA AG                                                                                                                                                                                                                                                                                                                                                                                                                                                                                                                                                                                                                                                                                                                                                                                                                                                                                                                                                                                                                                                                                                                                                                                                                                                                                                  | qPCR primers ( <i>nuoN</i> )                                                         |
| p990f<br>p991r                                                                                                                                                 | CAA TGA AAG GCC AGA TTG AAG G<br>GCT GTC GAC TTC GTT GAG AT                                                                                                                                                                                                                                                                                                                                                                                                                                                                                                                                                                                                                                                                                                                                                                                                                                                                                                                                                                                                                                                                                                                                                                                                                                                                                               | qPCR primers ( <i>rpiA</i> )                                                         |
| P980f<br>P981r                                                                                                                                                 | CTC GAT GAG AAG CAG GCT AAA G<br>GCT AAT GTT GCC CAG GTA GAA                                                                                                                                                                                                                                                                                                                                                                                                                                                                                                                                                                                                                                                                                                                                                                                                                                                                                                                                                                                                                                                                                                                                                                                                                                                                                              | qPCR primers ( <i>nlpI</i> )                                                         |
| p978f<br>p979r                                                                                                                                                 | TGA CTG CAC AGA TCA ACC AC<br>GCA GTT TAC GAC GCT GAG AA                                                                                                                                                                                                                                                                                                                                                                                                                                                                                                                                                                                                                                                                                                                                                                                                                                                                                                                                                                                                                                                                                                                                                                                                                                                                                                  | qPCR primers ( <i>rpsO</i> )                                                         |

|                |                                                                                                                       |                                                                                         |
|----------------|-----------------------------------------------------------------------------------------------------------------------|-----------------------------------------------------------------------------------------|
| p976f<br>p977r | CTG GAA GCT AAA CTG GCT GAA<br>AGC TTT AGA CGC GAT GGT AAC                                                            | qPCR primers ( <i>rplI</i> )                                                            |
| p974f<br>p975r | GCC TGC ATA TTC ACT CCT TCT<br>AGA GTA AAC AGA CGA CCA TCA C                                                          | qPCR primers ( <i>corA</i> )                                                            |
| p972f<br>p973r | TGA AGA AGC ACG TCG TAT GG<br>GGC GAG CAT GTT GAG AAG TA                                                              | qPCR primers ( <i>infB</i> )                                                            |
| p970f<br>p971r | CTC CAA TTC AGG CAG AGT GTA T<br>CAA GAT TCT GCA ACA GAG GTA AAG                                                      | qPCR primers ( <i>deaD</i> )                                                            |
| p968f<br>p969r | AAG GCT TCG GCT TCA TCA C<br>CTG ACC TTC GTC CAG AGA TTT G                                                            | qPCR primers ( <i>cspA</i> )                                                            |
| p966f<br>p967r | TGA AAC CAT GGG CGA TAT GA<br>GGA CGA TTT GAA ACG GGT ATT                                                             | qPCR primers ( <i>obgE</i> )                                                            |
| p964f<br>p965r | CGC TAT AAC CCG GAT GTT GAT<br>CAG GCT GGG ATC TTT CTC TTT                                                            | qPCR primers ( <i>sdhB</i> )                                                            |
| p962f<br>p963r | GGC TTT AGT TTA CGG GCT TTA C<br>AAG TGC CAG CCA GAT CAA                                                              | qPCR primers ( <i>glpF</i> )                                                            |
| p1019r         | CCC ACC TAT CCT ACA CAT CAA GGC TC                                                                                    | Reverse primer extension<br>oligo (23S rRNA)                                            |
| p805f<br>p806r | TGC GTA TGG TTA ACC CTA AAG TTA T<br>TTA TCT ACA TTC CCT TTA GTA ACG TG                                               | Cloning of the full-length<br><i>ermBL-ermB</i> operon into<br>pGEMT-Easy by TA cloning |
| p129f<br>p151r | TGA <u>AGC</u> TTA GAA GCA AAC TTA AGA GTG TG (HindIII)<br>TTT <u>TGG</u> ATC CGT TAA AAA GTT TTG AGA ATA TTT (BamHI) | Cloning of P <sub>erm</sub> - <i>ermBL-ermB</i><br>into pRB381                          |

## SUPPLEMENTAL REFERENCES

1. **Battesti A, Majdalani N, Gottesman S.** 2015. Stress sigma factor RpoS degradation and translation are sensitive to the state of central metabolism. *Proc Natl Acad Sci U S A* **112**:5159-5164.
